# Supplementary material for: Combination of FDG PET/CT Radiomics and Clinical Parameters for Outcome Prediction in Patients with Hodgkin’s Lymphoma
Source: MDPI journal article supplement (doi:10.3390/cancers15072056), 2023-03-30
Supplement: s1 [file s1]

**Supplemental Table:** UVA results for clinical variables.

Table S1. Effect on PFS

| Covariate                                               | HR(95%CI)                 | p-value          | Global value     | p- |
|---------------------------------------------------------|---------------------------|------------------|------------------|----|
| <b>GENDER</b>                                           |                           |                  | 0.27             |    |
| Female                                                  | Reference                 |                  |                  |    |
| Male                                                    | 2.15 (0.56,8.3)           |                  |                  |    |
| <b>PATH SUBTYPE TEXT</b>                                |                           |                  | 0.84             |    |
| Classical Hodgkin's lymphoma, NOS                       | Reference                 |                  |                  |    |
| Mixed cellularity classical Hodgkin lymphoma (MCHL)     | 7e-08 (0e+00,Inf)         | 1                |                  |    |
| Nodular lymphocyte predominant Hodgkin lymphoma (NLPHL) | 1.39 (0.09,22.26)         | 0.81             |                  |    |
| Nodular sclerosis classical Hodgkin lymphoma (NSHL)     | 2.36 (0.29,18.85)         | 0.42             |                  |    |
| <b>BULK SIZE</b>                                        | 1.25 (1.08,1.46)          |                  | <b>0.0035</b>    |    |
| <b>Overall stage</b>                                    |                           |                  | 0.13             |    |
| I + II                                                  | Reference                 |                  |                  |    |
| III + IV                                                | 2.85 (0.74,11.01)         |                  |                  |    |
| <b>BSYMPTOMS</b>                                        |                           |                  | <b>0.025</b>     |    |
| no                                                      | Reference                 |                  |                  |    |
| yes                                                     | 0.24 (0.07,0.84)          |                  |                  |    |
| <b>REGIMEN NAME CHEMO</b>                               |                           |                  | 0.53             |    |
| ABVE-PC                                                 | Reference                 |                  |                  |    |
| CT-A-AVD                                                | 1.3e-08 (0e+00,Inf)       | 1                |                  |    |
| CT-A+AVD                                                | 0.48 (0.03,7.73)          | 0.61             |                  |    |
| LY-ABVD                                                 | 0.18 (0.02,1.45)          | 0.11             |                  |    |
| OEPA/COPDAC                                             | 1.3e-08 (0e+00,Inf)       | 1                |                  |    |
| <b>CHEMOTHERAPY COMPLETED AS PLANNED</b>                |                           |                  | <b>0.0062</b>    |    |
| No                                                      | Reference                 |                  |                  |    |
| Yes                                                     | 0.11 (0.02,0.54)          |                  |                  |    |
| <b>RESPONSE TO CHEMO</b>                                |                           |                  | <b>&lt;0.001</b> |    |
|                                                         | Reference                 |                  |                  |    |
| CR - Completer response                                 | 1 (2.4e-95,4.2e+94)       | 1                |                  |    |
| PD - Progressive disease                                | 1.9e+04 (4.9e+03,7.1e+04) | <b>&lt;0.001</b> |                  |    |
| PR - Partial response                                   | 6.5e+03 (1.6e+03,2.7e+04) | <b>&lt;0.001</b> |                  |    |
| SD - Stable disease                                     | 1.4e+05 (1.1e+04,1.7e+06) | <b>&lt;0.001</b> |                  |    |
| <b>Hemoglobin RESULT</b>                                |                           |                  |                  |    |
| Normal                                                  | Reference                 |                  | <b>0.01</b>      |    |
| Abnormal                                                | 6.3e+08 (0e+00,Inf)       |                  | 1                |    |
| <b>WBC RESULT</b>                                       |                           |                  |                  |    |
| Abnormal                                                | Reference                 |                  | 0.27             |    |

|                           |                     |                  |
|---------------------------|---------------------|------------------|
| Normal                    | 0.38 (0.11,1.33)    | 0.13             |
| <b>Neutrophils RESULT</b> |                     |                  |
| Abnormal                  | Reference           | 0.22             |
| Normal                    | 0.17 (0.04,0.8)     | <b>0.025</b>     |
| <b>Lymphocytes RESULT</b> |                     |                  |
| Abnormal                  | Reference           | 0.19             |
| Normal                    | 0.26 (0.05,1.21)    | 0.085            |
| <b>Eosinophils RESULT</b> |                     |                  |
| Abnormal                  | Reference           | 0.73             |
| Normal                    | 0.6 (0.17,2.12)     | 0.43             |
| <b>ESR RESULT</b>         |                     |                  |
| Abnormal                  | Reference           | <b>&lt;0.001</b> |
| Normal                    | 3.3e-09 (0e+00,Inf) | 1                |
| <b>LDH RESULT</b>         |                     |                  |
| Abnormal                  | Reference           | 0.47             |
| Normal                    | 0.61 (0.16,2.37)    | 0.48             |
| <b>ALP RESULT</b>         |                     |                  |
| Normal                    | Reference           | <b>0.035</b>     |
| Abnormal                  | 11.73 (3.29,41.81)  | <b>&lt;0.001</b> |
| <b>ALT RESULT</b>         |                     |                  |
| Abnormal                  | Reference           | 0.56             |
| Normal                    | 8.7e+07 (0e+00,Inf) | 1                |
| <b>AST RESULT</b>         |                     |                  |
| Abnormal                  | Reference           | 0.25             |
| Normal                    | 7.6e+07 (0e+00,Inf) | 1                |
| <b>Albumin RESULT</b>     |                     |                  |
| Normal                    | Reference           | <b>&lt;0.001</b> |
| Abnormal                  | 11.54 (2.39,55.67)  | <b>0.0023</b>    |
| <b>Creatinine RESULT</b>  |                     |                  |
| Abnormal                  | Reference           | 0.5              |
| Normal                    | 2.6e+07 (0e+00,Inf) | 1                |
| <b>Calcium RESULT</b>     |                     |                  |
| Abnormal                  | Reference           | 0.071            |
| Normal                    | 0.72 (0.09,5.68)    | 0.76             |

Table S2. Effect on Radiotherapy outcome.

| Covariate                                           | OR(95%CI)         | p-value | Global value | p- |
|-----------------------------------------------------|-------------------|---------|--------------|----|
| <b>GENDER</b>                                       |                   |         | 0.82         |    |
| Female                                              | Reference         |         |              |    |
| Male                                                | 1.1 (0.48,2.54)   |         |              |    |
| <b>PATH SUBTYPE TEXT</b>                            |                   |         | 0.4          |    |
| Classical Hodgkin's lymphoma, NOS                   | Reference         |         |              |    |
| Mixed cellularity classical Hodgkin lymphoma (MCHL) | 3.11 (0.28,34.42) | 0.35    |              |    |

|                                                         |                        |      |                  |
|---------------------------------------------------------|------------------------|------|------------------|
| Nodular lymphocyte predominant Hodgkin lymphoma (NLPHL) | 0.93 (0.2,4.37)        | 0.93 |                  |
| Nodular sclerosis classical Hodgkin lymphoma (NSHL)     | 0.58 (0.19,1.79)       | 0.35 |                  |
| <b>BULK SIZE</b>                                        | 0.99 (0.88,1.12)       |      | 0.88             |
| <b>Overall stage</b>                                    |                        |      | <b>&lt;0.001</b> |
| I + II                                                  | Reference              |      |                  |
| III + IV                                                | 0.05 (0.02,0.14)       |      |                  |
| <b>BSYMPTOMS</b>                                        |                        |      | <b>0.0048</b>    |
| no                                                      | Reference              |      |                  |
| yes                                                     | 4.51 (1.58,12.83)      |      |                  |
| <b>COMPLETED AS PLANNED CHEMO</b>                       |                        |      | 0.36             |
| No                                                      | Reference              |      |                  |
| Yes                                                     | 2.93 (0.29,29.32)      |      |                  |
| <b>RESPONSE TO CHEMO 1</b>                              |                        |      | 0.81             |
|                                                         | Reference              |      |                  |
| CR - Completer response                                 | 2.7e-08<br>(0e+00,Inf) | 1    |                  |
| PD - Progressive disease                                | 2.7e-08<br>(0e+00,Inf) | 0.99 |                  |
| PR - Partial response                                   | 1.55 (0.32,7.58)       | 0.59 |                  |
| SD - Stable disease                                     | 2.7e-08<br>(0e+00,Inf) | 1    |                  |
| <b>Hemoglobin RESULT</b>                                |                        |      | <b>0.0012</b>    |
| Normal                                                  | Reference              |      |                  |
| Abnormal                                                | 0.23 (0.09,0.56)       |      |                  |
| <b>WBC RESULT</b>                                       |                        |      | 0.39             |
| Abnormal                                                | Reference              |      |                  |
| Normal                                                  | 1.46 (0.61,3.5)        |      |                  |
| <b>Neutrophils RESULT</b>                               |                        |      | 0.42             |
| Abnormal                                                | Reference              |      |                  |
| Normal                                                  | 1.42 (0.6,3.34)        |      |                  |
| <b>Lymphocytes RESULT</b>                               |                        |      | <b>0.0086</b>    |
| Abnormal                                                | Reference              |      |                  |
| Normal                                                  | 3.25 (1.35,7.82)       |      |                  |
| <b>Eosinophils RESULT</b>                               |                        |      | 0.61             |
| Abnormal                                                | Reference              |      |                  |
| Normal                                                  | 1.27 (0.5,3.24)        |      |                  |
| <b>ESR RESULT</b>                                       |                        |      | <b>0.028</b>     |
| Abnormal                                                | Reference              |      |                  |
| Normal                                                  | 3.6 (1.15,11.29)       |      |                  |
| <b>LDH RESULT</b>                                       |                        |      | 0.22             |
| Abnormal                                                | Reference              |      |                  |
| Normal                                                  | 1.73 (0.72,4.13)       |      |                  |
| <b>ALP RESULT</b>                                       |                        |      | <b>0.031</b>     |
| Normal                                                  | Reference              |      |                  |
| Abnormal                                                | 0.18 (0.04,0.85)       |      |                  |
| <b>ALT RESULT</b>                                       |                        |      | 0.11             |
| Abnormal                                                | Reference              |      |                  |

|                          |                  |      |
|--------------------------|------------------|------|
| Normal                   | 0.36 (0.1,1.27)  |      |
| <b>AST RESULT</b>        |                  | 0.6  |
| Abnormal                 | Reference        |      |
| Normal                   | 0.66 (0.14,3.14) |      |
| <b>Albumin RESULT</b>    |                  | 0.18 |
| Normal                   | Reference        |      |
| Abnormal                 | 0.48 (0.17,1.4)  |      |
| <b>Creatinine RESULT</b> |                  | 0.94 |
| Abnormal                 | Reference        |      |
| Normal                   | 0.93 (0.13,6.92) |      |
| <b>Calcium RESULT</b>    |                  | 0.9  |
| Abnormal                 | Reference        |      |
| Normal                   | 0.9 (0.17,4.75)  |      |
